# Supplementary material for: Combining potassium with positive oxygen-balanced polynitropyrazole: a promising way to develop green primary explosives
Source: Royal Society of Chemistry journal article supplement (doi:10.1039/d1nj04452d), 2021-01-01
Supplement: d1nj04452d1.pdf [file d1nj04452d1.pdf]

## Supporting information(SI)

### **Combining Potassium With Positive Oxygen-balanced Polynitropyrazole: a Promising Way to Develop Green Primary Explosives.**

Benyue Guo<sup>a,1</sup>, Xiya Zhang<sup>a,1</sup>, Xiangyang Lin<sup>\*a</sup>, Haifeng Huang<sup>\*b</sup>, Jun Yang<sup>\*b</sup>

<sup>a</sup> School of Chemical Engineering, Nanjing University of Science and Technology, Xiaolingwei 200, Nanjing, Jiangsu, China. E-mail: [lingxiangyang@njust.edu.cn](mailto:lingxiangyang@njust.edu.cn);

<sup>b</sup> CAS Key Laboratory of Energy Regulation Materials, Center for Excellent in Molecular Synthesis, Shanghai institute of Organic Chemistry, University of Chinese Academy of Sciences, Chinese Academy of Sciences, Shanghai 200032, (PR China).

E-mail: [yangj@sioc.ac.cn](mailto:yangj@sioc.ac.cn), [hfh Huang@sioc.ac.cn](mailto:hfh Huang@sioc.ac.cn)

#### **1. Experimental Section**

#### **2. Crystallographic data for compound 6 and 8·2H<sub>2</sub>O**

#### **3. Gaussian calculation**

#### **4. NMR Spectrum of the prepared compounds**

#### **5. Mass spectrometry of compound 5 and 8·2H<sub>2</sub>O.**

#### **6. DSC curves of compounds 6 and 8·2H<sub>2</sub>O.**

## 1. Experimental section

$^1\text{H}$  and  $^{13}\text{C}$  NMR spectra were recorded on 500 MHz (Bruker AVANCE 500) nuclear magnetic resonance spectrometers operating at 500 and 125 MHz, respectively. Chemical shifts in  $^1\text{H}$  and  $^{13}\text{C}$  NMR spectra are reported relative to DMSO. The decomposition points were recorded on a METTLER TOLEDO DSC823E equipment at a heating rate of  $10\text{ }^\circ\text{C min}^{-1}$  in closed Al containers with a nitrogen flow of  $25\text{ ml min}^{-1}$ . FT-IR spectra were analyzed with the NicoLiteS10 (Thermal Fisher, USA) FT-IR. Friction sensitivity, impact sensitivity of samples were measured by using the standard BAM methods. Elemental analyses were performed on an Elementar Vario MICRO cube (Germany) elemental analyzer.

### X-ray crystallography

X-ray of all single crystals were carried out at 140K or 170k on a Bruker D8 VENTURE diffractometer using Mo-K $\alpha$  radiation ( $\lambda=0.71073\text{ \AA}$ ). Integration and scaling of intensity data was performed using the SAINT program. Data were corrected for the effects of absorption using SADABS<sup>[1]</sup>. The structures were solved by direct method and refined with full-matrix least-squares technique using SHELX-2014<sup>[2]</sup> software. Non-hydrogen atoms were refined with anisotropic displacement parameters, and hydrogen atoms were placed in calculated positions and refined with riding model.

## 2. Crystallographic data for compound **6** and **8**·2H<sub>2</sub>O

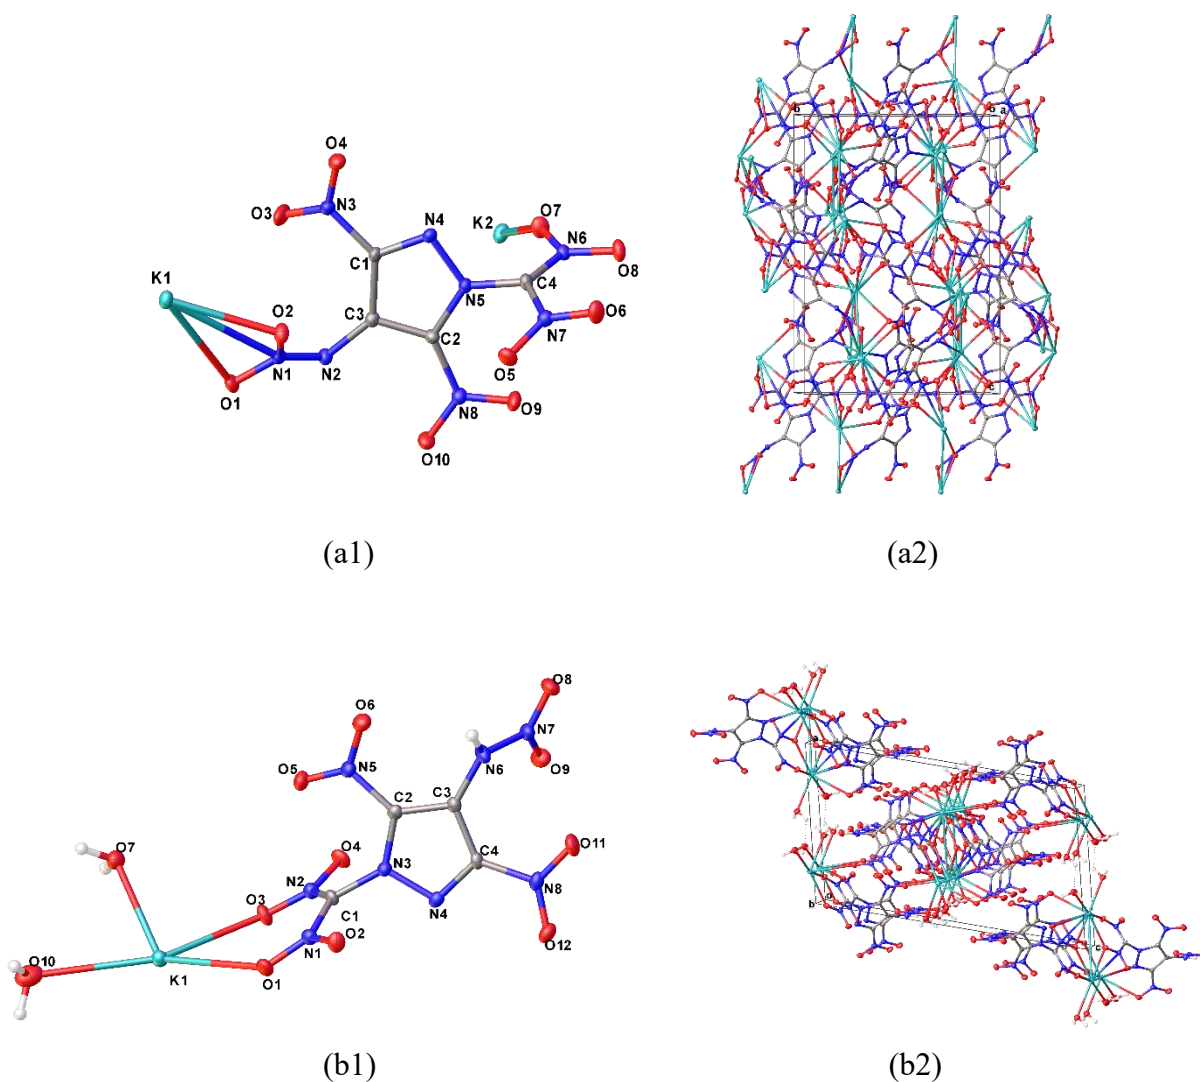

**Figure S1:** (a1) (b1): Displacement ellipsoid plot (30%) of compounds **6** and **8**·2H<sub>2</sub>O; (a2) (b2): Ball-and-stick packing diagram of compounds **6** and **8**·2H<sub>2</sub>O viewed down the a-axis and b-axis, respectively. The dashed lines indicate hydrogen bonding.

**Table S1.** Crystal data and structure refinement for compound **6** and **8·2H<sub>2</sub>O**.

| Compound                                       | <b>6</b>                                                         | <b>8·2H<sub>2</sub>O</b>                                      |
|------------------------------------------------|------------------------------------------------------------------|---------------------------------------------------------------|
| CCDC                                           | CCDC-2081188                                                     | CCDC-2098704                                                  |
| Empirical formula                              | C <sub>4</sub> K <sub>2</sub> N <sub>8</sub> O <sub>10</sub>     | C <sub>4</sub> H <sub>5</sub> KN <sub>8</sub> O <sub>12</sub> |
| Formula weight                                 | 398.32                                                           | 396.26                                                        |
| Temperature/K                                  | 170.0                                                            | 140.0                                                         |
| Crystal system                                 | orthorhombic                                                     | monoclinic                                                    |
| Space group                                    | Pbca                                                             | P2 <sub>1</sub> /n                                            |
| Unit cell dimensions                           | a=10.7902(3)Å                                                    | a=11.266(6)Å                                                  |
|                                                | b=12.9624(4)Å                                                    | b=6.3213(19)Å                                                 |
|                                                | c=17.9460(6)Å                                                    | c=19.213(7)Å                                                  |
|                                                | α=90°                                                            | α=90°                                                         |
|                                                | β=90°                                                            | β=103.155(17)°                                                |
|                                                | γ=90°                                                            | γ=90°                                                         |
| Volume/Å <sup>3</sup>                          | 2510.05(13)                                                      | 1332.4(9)                                                     |
| Z                                              | 8                                                                | 4                                                             |
| ρ <sub>calc</sub> g/cm <sup>3</sup>            | 2.108                                                            | 1.975                                                         |
| Crystal size/mm <sup>3</sup>                   | 0.12 × 0.11 × 0.06                                               | 0.11 × 0.06 × 0.03                                            |
| Radiation                                      | MoKα (λ = 0.71073)                                               | MoKα (λ = 0.71073)                                            |
| 2θ range for data collection/°                 | 4.54 to 52.772                                                   | 3.852 to 52.802                                               |
| Index ranges                                   | -13 ≤ h ≤ 13, -16 ≤ k ≤ 14,<br>-22 ≤ l ≤ 20                      | —                                                             |
| Reflections collected                          | 19689                                                            | 2711                                                          |
| Independent reflections                        | 2551 [R <sub>int</sub> = 0.0555,<br>R <sub>sigma</sub> = 0.0307] | 2711 [R <sub>int</sub> = 0, R <sub>sigma</sub> =<br>0.0826]   |
| Data/restraints/parameters                     | 2551/0/217                                                       | 2711/0/228                                                    |
| Goodness-of-fit on F <sup>2</sup>              | 1.057                                                            | 1.075                                                         |
| Final R indexes [I ≥ 2σ (I)]                   | R <sub>1</sub> = 0.0285, wR <sub>2</sub> = 0.0627                | R <sub>1</sub> = 0.0686, wR <sub>2</sub> =<br>0.1131          |
| Final R indexes [all data]                     | R <sub>1</sub> = 0.0403, wR <sub>2</sub> = 0.0686                | R <sub>1</sub> = 0.1183, wR <sub>2</sub> =<br>0.1311          |
| Largest diff. peak/hole / e<br>Å <sup>-3</sup> | 0.28/-0.31                                                       | 0.39/-0.40                                                    |

**Table S2.** Bonds Lengths of **6**

| Atom | Atom  | Length/Å   | Atom  | Atom | Length/Å |
|------|-------|------------|-------|------|----------|
| K(1) | K(2)  | 4.4451(6)  | O(8)  | N(6) | 1.253(2) |
| K(1) | K(2)  | 4.1700(6)  | O(4)  | N(3) | 1.230(2) |
| K(1) | O(2)  | 2.7055(14) | O(1)  | N(1) | 1.257(2) |
| K(1) | O(8)  | 2.7981(14) | O(7)  | N(6) | 1.249(2) |
| K(1) | O(4)  | 2.9564(15) | O(10) | N(8) | 1.230(2) |
| K(1) | O(1)  | 2.9977(15) | O(9)  | N(8) | 1.231(2) |
| K(1) | O(10) | 2.7727(15) | O(5)  | N(7) | 1.246(2) |
| K(1) | O(5)  | 2.7812(14) | O(6)  | N(7) | 1.238(2) |
| K(1) | N(1)  | 3.2097(16) | N(1)  | N(2) | 1.308(2) |
| K(1) | N(4)  | 2.8371(16) | N(6)  | C(4) | 1.365(2) |
| K(1) | N(2)  | 3.0648(16) | O(3)  | N(3) | 1.221(2) |
| K(2) | O(2)  | 2.6417(14) | N(4)  | N(5) | 1.343(2) |
| K(2) | O(8)  | 2.7380(14) | N(4)  | C(1) | 1.316(2) |
| K(2) | O(4)  | 3.0086(15) | N(2)  | C(3) | 1.386(2) |
| K(2) | O(1)1 | 2.6570(14) | N(5)  | C(4) | 1.401(2) |
| K(2) | O(7)  | 2.6359(14) | N(5)  | C(2) | 1.379(2) |
| K(2) | O(10) | 3.1737(16) | N(7)  | C(4) | 1.397(2) |
| K(2) | O(9)  | 2.8650(15) | N(8)  | C(2) | 1.423(2) |
| K(2) | O(6)  | 2.7294(16) | N(3)  | C(1) | 1.447(2) |
| K(2) | N(8)  | 3.3504(17) | C(1)  | C(3) | 1.423(3) |
| O(2) | N(1)  | 1.2652(19) | C(3)  | C(2) | 1.379(3) |

**Table S3.** Bonds Angles for **6**

| Atom | Atom | Atom  | Angle/°    | Atom  | Atom | Atom  | Angle/°   |
|------|------|-------|------------|-------|------|-------|-----------|
| K(2) | K(1) | K(2)  | 108.23(12) | O(7)  | K(2) | O(8)  | 120.94(5) |
| O(2) | K(1) | K(2)  | 38.21(3)   | O(7)  | K(2) | O(4)  | 105.46(4) |
| O(2) | K(1) | K(2)  | 75.41(3)   | O(7)  | K(2) | O(1)  | 163.82(5) |
| O(2) | K(1) | O(8)  | 97.58(4)   | O(7)  | K(2) | O(10) | 65.21(4)  |
| O(2) | K(1) | O(4)  | 75.40(4)   | O(7)  | K(2) | O(9)  | 86.16(5)  |
| O(2) | K(1) | O(1)  | 44.44(4)   | O(7)  | K(2) | O(6)  | 97.03(5)  |
| O(2) | K(1) | O(10) | 118.55(4)  | O(7)  | K(2) | N(8)  | 78.79(4)  |
| O(2) | K(1) | O(5)  | 142.60(4)  | O(10) | K(2) | K(1)  | 166.65(3) |
| O(2) | K(1) | N(1)  | 22.71(4)   | O(10) | K(2) | K(1)  | 89.52(3)  |
| O(2) | K(1) | N(4)  | 124.51(5)  | O(10) | K(2) | N(8)  | 21.52(4)  |
| O(2) | K(1) | N(2)  | 79.54(4)   | O(9)  | K(2) | K(1)  | 130.40(3) |
| O(8) | K(1) | K(2)  | 36.13(3)   | O(9)  | K(2) | K(1)  | 75.09(3)  |
| O(8) | K(1) | K(2)  | 135.74(3)  | O(9)  | K(2) | O(4)  | 85.34(4)  |
| O(8) | K(1) | O(4)  | 143.11(4)  | O(9)  | K(2) | O(10) | 41.71(4)  |
| O(8) | K(1) | O(1)  | 69.09(4)   | O(9)  | K(2) | N(8)  | 21.05(4)  |
| O(8) | K(1) | N(1)  | 78.93(4)   | O(6)  | K(2) | K(1)  | 102.71(3) |
| O(8) | K(1) | N(4)  | 136.31(5)  | O(6)  | K(2) | K(1)  | 79.97(3)  |

|       |      |      |            |      |       |       |            |
|-------|------|------|------------|------|-------|-------|------------|
| O(8)  | K(1) | N(2) | 124.49(4)  | O(6) | K(2)  | O(8)  | 57.92(4)   |
| O(4)  | K(1) | K(2) | 108.76(3)  | O(6) | K(2)  | O(4)  | 144.77(4)  |
| O(4)  | K(1) | K(2) | 46.16(3)   | O(6) | K(2)  | O(10) | 89.14(4)   |
| O(4)  | K(1) | O(1) | 82.09(4)   | O(6) | K(2)  | O(9)  | 123.48(4)  |
| O(4)  | K(1) | N(1) | 83.32(4)   | O(6) | K(2)  | N(8)  | 104.43(4)  |
| O(4)  | K(1) | N(2) | 90.38(4)   | N(8) | K(2)  | K(1)  | 151.40(3)  |
| O(1)  | K(1) | K(2) | 72.84(3)   | N(8) | K(2)  | K(1)  | 77.68(3)   |
| O(1)  | K(1) | K(2) | 35.54(3)   | K(2) | O(2)  | K(1)  | 102.49(4)  |
| O(1)  | K(1) | N(1) | 23.04(4)   | N(1) | O(2)  | K(1)  | 101.65(10) |
| O(1)  | K(1) | N(2) | 123.66(4)  | N(1) | O(2)  | K(2)  | 135.58(11) |
| O(10) | K(1) | K(2) | 112.08(3)  | K(2) | O(8)  | K(1)  | 106.81(5)  |
| O(10) | K(1) | K(2) | 120.43(3)  | N(6) | O(8)  | K(1)  | 127.53(10) |
| O(10) | K(1) | O(8) | 76.51(4)   | N(6) | O(8)  | K(2)  | 125.65(10) |
| O(10) | K(1) | O(4) | 138.98(4)  | K(1) | O(4)  | K(2)  | 88.70(4)   |
| O(10) | K(1) | O(1) | 136.18(4)  | N(3) | O(4)  | K(1)  | 122.24(11) |
| O(10) | K(1) | O(5) | 93.62(4)   | N(3) | O(4)  | K(2)  | 111.14(11) |
| O(10) | K(1) | N(1) | 125.23(4)  | K(2) | O(1)  | K(1)  | 103.48(5)  |
| O(10) | K(1) | N(4) | 91.11(5)   | N(1) | O(1)  | K(1)  | 87.99(10)  |
| O(10) | K(1) | N(2) | 58.45(4)   | N(1) | O(1)  | K(2)  | 128.87(11) |
| O(5)  | K(1) | K(2) | 138.80(3)  | N(6) | O(7)  | K(2)  | 152.17(12) |
| O(5)  | K(1) | K(2) | 74.97(3)   | K(1) | O(10) | K(2)  | 120.25(5)  |
| O(5)  | K(1) | O(8) | 70.34(4)   | N(8) | O(10) | K(1)  | 152.22(13) |
| O(5)  | K(1) | O(4) | 93.14(4)   | N(8) | O(10) | K(2)  | 87.36(11)  |
| O(5)  | K(1) | O(1) | 99.35(4)   | N(8) | O(9)  | K(2)  | 102.28(11) |
| O(5)  | K(1) | N(1) | 122.34(4)  | N(7) | O(5)  | K(1)  | 127.20(12) |
| O(5)  | K(1) | N(4) | 68.85(4)   | N(7) | O(6)  | K(2)  | 132.19(12) |
| O(5)  | K(1) | N(2) | 136.90(5)  | O(2) | N(1)  | K(1)  | 55.64(9)   |
| N(1)  | K(1) | K(2) | 52.86(3)   | O(2) | N(1)  | N(2)  | 123.09(15) |
| N(1)  | K(1) | K(2) | 57.62(3)   | O(1) | N(1)  | K(1)  | 68.97(9)   |
| N(4)  | K(1) | K(2) | 138.02(3)  | O(1) | N(1)  | O(2)  | 119.05(15) |
| N(4)  | K(1) | K(2) | 86.72(3)   | O(1) | N(1)  | N(2)  | 117.83(15) |
| N(4)  | K(1) | O(4) | 54.40(4)   | N(2) | N(1)  | K(1)  | 157.74(12) |
| N(4)  | K(1) | O(1) | 132.60(4)  | O(8) | N(6)  | C(4)  | 121.29(16) |
| N(4)  | K(1) | N(1) | 137.60(4)  | O(7) | N(6)  | O(8)  | 121.63(15) |
| N(4)  | K(1) | N(2) | 78.85(4)   | O(7) | N(6)  | C(4)  | 117.08(16) |
| N(2)  | K(1) | K(2) | 62.80(3)   | N(5) | N(4)  | K(1)  | 129.26(11) |
| N(2)  | K(1) | K(2) | 143.03(3)  | C(1) | N(4)  | K(1)  | 125.21(12) |
| N(2)  | K(1) | N(1) | 100.74(4)  | C(1) | N(4)  | N(5)  | 105.29(15) |
| K(1)  | K(2) | K(1) | 98.499(11) | N(1) | N(2)  | K(1)  | 108.38(10) |
| O(2)  | K(2) | K(1) | 39.30(3)   | N(1) | N(2)  | C(3)  | 112.71(14) |
| O(2)  | K(2) | K(1) | 130.01(3)  | C(3) | N(2)  | K(1)  | 131.13(12) |
| O(2)  | K(2) | O(8) | 140.34(5)  | N(4) | N(5)  | C(4)  | 118.41(15) |
| O(2)  | K(2) | O(4) | 75.41(4)   | N(4) | N(5)  | C(2)  | 110.21(15) |
| O(2)  | K(2) | O(1) | 92.26(4)   | C(2) | N(5)  | C(4)  | 131.03(16) |

|      |      |       |           |       |      |      |            |
|------|------|-------|-----------|-------|------|------|------------|
| O(2) | K(2) | O(10) | 137.99(4) | O(5)  | N(7) | C(4) | 115.86(16) |
| O(2) | K(2) | O(9)  | 147.32(4) | O(6)  | N(7) | O(5) | 122.65(16) |
| O(2) | K(2) | O(6)  | 85.34(4)  | O(6)  | N(7) | C(4) | 121.48(16) |
| O(2) | K(2) | N(8)  | 152.23(4) | O(10) | N(8) | K(2) | 71.13(10)  |
| O(8) | K(2) | K(1)  | 37.06(3)  | O(10) | N(8) | O(9) | 123.55(16) |
| O(8) | K(2) | K(1)  | 129.41(3) | O(10) | N(8) | C(2) | 117.80(16) |
| O(8) | K(2) | O(4)  | 125.74(4) | O(9)  | N(8) | K(2) | 56.67(9)   |
| O(8) | K(2) | O(10) | 62.32(4)  | O(9)  | N(8) | C(2) | 118.65(15) |
| O(8) | K(2) | O(9)  | 72.26(4)  | C(2)  | N(8) | K(2) | 156.87(12) |
| O(8) | K(2) | N(8)  | 61.55(4)  | O(4)  | N(3) | C(1) | 117.97(16) |
| O(4) | K(2) | K(1)  | 90.09(3)  | O(3)  | N(3) | O(4) | 124.38(17) |
| O(4) | K(2) | K(1)  | 45.14(3)  | O(3)  | N(3) | C(1) | 117.62(16) |
| O(4) | K(2) | O(10) | 124.76(4) | N(4)  | C(1) | N(3) | 116.90(16) |
| O(4) | K(2) | N(8)  | 106.28(4) | N(4)  | C(1) | C(3) | 114.00(17) |
| O(1) | K(2) | K(1)  | 57.53(3)  | C(3)  | C(1) | N(3) | 129.05(17) |
| O(1) | K(2) | K(1)  | 40.98(3)  | N(2)  | C(3) | C(1) | 132.21(18) |
| O(1) | K(2) | O(8)  | 75.16(4)  | C(2)  | C(3) | N(2) | 126.48(17) |
| O(1) | K(2) | O(4)  | 61.65(4)  | C(2)  | C(3) | C(1) | 101.23(16) |
| O(1) | K(2) | O(10) | 129.47(4) | N(6)  | C(4) | N(5) | 117.85(16) |
| O(1) | K(2) | O(9)  | 101.62(4) | N(6)  | C(4) | N(7) | 124.51(17) |
| O(1) | K(2) | O(6)  | 90.51(4)  | N(7)  | C(4) | N(5) | 116.77(16) |
| O(1) | K(2) | N(8)  | 113.23(4) | N(5)  | C(2) | N(8) | 121.30(17) |
| O(7) | K(2) | K(1)  | 106.66(3) | N(5)  | C(2) | C(3) | 109.23(16) |
| O(7) | K(2) | K(1)  | 154.66(4) | C(3)  | C(2) | N(8) | 129.42(17) |

**Table S4.** Torsion Angles for **6**

| A   | B   | C  | D   | Angle/°    | A   | B  | C  | D  | Angle/°     |
|-----|-----|----|-----|------------|-----|----|----|----|-------------|
| K1  | O2  | N1 | O1  | -28.70(11) | K24 | O9 | N8 | C2 | 153.50(10)  |
| K1  | O2  | N1 | N2  | 153.20(10) | K28 | O6 | N7 | O5 | -151.3(15)  |
| K11 | O8  | N6 | O7  | -52.28(15) | K28 | O6 | N7 | C4 | 27.80(18)   |
| K11 | O8  | N6 | C4  | 127.96(14) | K24 | N8 | C2 | N5 | 69.0(3)     |
| K12 | O4  | N3 | O3  | -156.6(14) | K24 | N8 | C2 | C3 | -108.2(3)   |
| K12 | O4  | N3 | C1  | 21.32(14)  | O2  | N1 | N2 | C3 | -9.28(19)   |
| K1  | O1  | N1 | O2  | 25.14(10)  | O8  | N6 | C4 | N5 | -176.2(16)  |
| K1  | O1  | N1 | N2  | -156.67(9) | O8  | N6 | C4 | N7 | -7.3(2)     |
| K13 | O10 | N8 | K24 | -173.9(3)  | O4  | N3 | C1 | N4 | -19.90(18)  |
| K13 | O10 | N8 | O9  | -151.3(3)  | O4  | N3 | C1 | C3 | 162.92(16)  |
| K13 | O10 | N8 | C2  | 29.4(3)    | O1  | N1 | N2 | C3 | 172.61(17)  |
| K15 | O5  | N7 | O6  | -23.59(16) | O7  | N6 | C4 | N5 | 4.02(18)    |
| K15 | O5  | N7 | C4  | 157.24(14) | O7  | N6 | C4 | N7 | 172.95(15)  |
| K1  | N1  | O2 | K26 | 121.73(10) | O10 | N8 | C2 | N5 | 176.72(16)  |
| K1  | N1  | O1 | K27 | 105.74(7)  | O10 | N8 | C2 | C3 | -0.5(2)     |
| K1  | N1  | N2 | K13 | -137.1(3)  | O9  | N8 | C2 | N5 | -2.59(19)   |
| K1  | N1  | N2 | C3  | 70.0(3)    | O9  | N8 | C2 | C3 | -179.83(16) |





**Table S5.** Ab Initio computational data.

| Specis                                                                             | $E_0^a$<br>/Hatree | $H_{\text{corr}}^b$<br>/ Hatree | ZPE <sup>c</sup><br>/ Hatree | $\Delta H_f^d$<br>/ Hatree |
|------------------------------------------------------------------------------------|--------------------|---------------------------------|------------------------------|----------------------------|
| 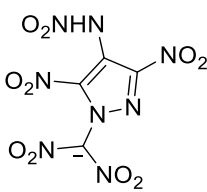  | -1340.4226         | 0.134116                        | 0,011458                     | -151.9535387               |
|   | -1339.8123         | 0.120089                        | 0.100826                     | -38.5654                   |
| CH <sub>4</sub>                                                                    | -40.39849          | 0.048605                        | 0.044793                     | -74.6                      |
| NH <sub>3</sub>                                                                    | -56.43418          | 0.03819                         | 0.034372                     | -45.9                      |
|  | -225.7181          | 0.075955                        | 0.071265                     | 105.4                      |
| CH <sub>3</sub> NO <sub>2</sub>                                                    | -244.5544          | 0.055129                        | 0.049856                     | -74.3                      |
| CH <sub>3</sub> NH <sub>2</sub>                                                    | -95.63188          | 0.068401                        | 0.064032                     | -23                        |
| <sup>-</sup> NHNO <sub>2</sub>                                                     | -260.012           | 0.03044                         | 0.026167                     | -84                        |
| <sup>-</sup> CHC(NO <sub>2</sub> ) <sub>2</sub>                                    | -448.1641          | 0.046605                        | 0.039726                     | -233                       |
| NH <sub>2</sub> NO <sub>2</sub>                                                    | -260.5479          | 0.042613                        | 0.039257                     | -6.1                       |
| K <sup>+</sup>                                                                     | —                  | —                               | —                            | 501.1 <sup>[3]</sup>       |

<sup>a</sup> Total energy ( $E_0$ ) calculated by MP2/6-311++G\*\*//B3LYP/6-31+G\*\* method; <sup>b</sup> Values of thermal correction ( $H_{\text{corr}}$ ); <sup>c</sup> Zero-point energy correction (ZPE); <sup>d</sup> Heat of formation ( $\Delta H_f$ ).

### Heat of formation

Calculations were carried out by using the Gaussian 09 (Revision E.01) suite of programs.<sup>[4]</sup> The geometric optimization of the structures and frequency analyses were carried out by using the B3LYP functional with the 6-31+G\*\*basis set, and single-point

energies were calculated at the MP2(full)/6-311++G\*\*level. All of the optimized structures were characterized to be true local energy minima on the potential-energy surface without imaginary frequencies.

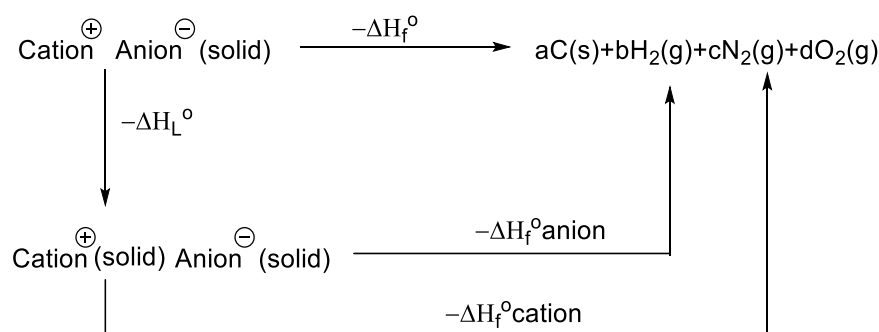

**Figure S2.** Born-Haber cycle for the formation for energetic salts.

Based on the Born-Haber energy cycle (Figure S20), the heat of formation of a salt can be simplified according to Equation (1), where  $\Delta H_L$  is the lattice energy of the salt.

$$\Delta H_f^\circ(\text{ionic salt, 298K}) = \Delta H_f^\circ(\text{cation, 298K}) + \Delta H_f^\circ(\text{anion, 298K}) - \Delta H_L \quad (1)$$

The  $\Delta H_L$  value could be predicted by the formula suggested by Jenkins et al [Eq. (2)]<sup>[i]</sup>, where  $U_{\text{POT}}$  is the lattice potential energy and  $n_M$  and  $n_X$  depend on the nature of the ions  $M^{p+}$  and  $X^{q-}$ , respectively, and are equal to three for monoatomic ions, five for linear polyatomic ions, and six for nonlinear polyatomic ions.

$$\Delta H_L = U_{\text{POT}} + [p(n_M/2-2) + q(n_X/2-2)]RT \quad (2)^{[5]}$$

The equation for the lattice potential energy,  $U_{\text{POT}}$ , takes the form of Equation (3), where  $\rho_m$  is the density ( $\text{g cm}^{-3}$ ),  $M_m$  is the chemical formula mass of the ionic material (g), and the coefficients  $\gamma$  ( $\text{kJ}^{-1}\text{mol}^{-1}\text{cm}$ ) and  $\delta$  ( $\text{kJ}^{-1}\text{mol}^{-1}$ ) are assigned literature values (2:1 salts  $\gamma=8375.6$ ,  $\delta=-178.8$ ; 1:1 salts  $\gamma=1981.2$   $\delta=103.8$ )<sup>[6]</sup>.

$$U_{\text{POT}} (\text{kJ}^{-1}\text{mol}^{-1}) = \gamma (\rho_m/M_m)^{1/3} + \delta \quad (3)$$

**Table S6.** Calculated heat of formation for **6** and **8**·2H<sub>2</sub>O.

| Compound            | $\Delta H_L$<br>(KJ/mol) | $\Delta H_f^{\text{cation}}$<br>(KJ/mol) | $\Delta H_f^{\text{Anion}}$<br>(KJ/mol) | $\Delta H_f^{298K}$<br>(KJ/mol) |
|---------------------|--------------------------|------------------------------------------|-----------------------------------------|---------------------------------|
| 6                   | 1279.3                   | 501.1                                    | -38.6                                   | -315.7                          |
| 8·2H <sub>2</sub> O | 1242.5                   | 501.1                                    | -152.0                                  | -893.3                          |

### Detonation performances calculation

Detonation pressure ( $P$ ) and detonation velocity ( $D$ ) were calculation according to the Kamlet-Jacobs equations<sup>[6]</sup>.

$$D = 1.01(N\bar{M}^{1/2}Q^{1/2})^{1/2} (1 + 1.30\rho) \quad (4)$$

$$P = 1.558\rho^2\bar{M}^{1/2}Q^{1/2} \quad (5)$$

where each term in eqs 4 and 5 is defined as follows:  $D$ , the detonation velocity ( $\text{km s}^{-1}$ );  $P$ , the detonation pressure (GPa);  $N$ , the moles of detonation gases per gram explosive;  $M$  the average molecular weight of these gases ( $\text{g mol}^{-1}$ );  $Q$ , the heat of

detonation<sup>[6a]</sup> (cal g<sup>-1</sup>); and  $\rho$ , the loaded density of explosives (g cm<sup>-3</sup>). The density calculated by single crystal X-ray diffractometer at low temperature were ture to density at 298K by the volume expansion equation (6).

$$\rho = \frac{\rho T}{(1+\alpha v(298-T))}; \quad \alpha v = 1.5 \times 10^{-4} K^{-1} \quad (6)$$

#### 4. NMR Spectrum of the prepared compounds

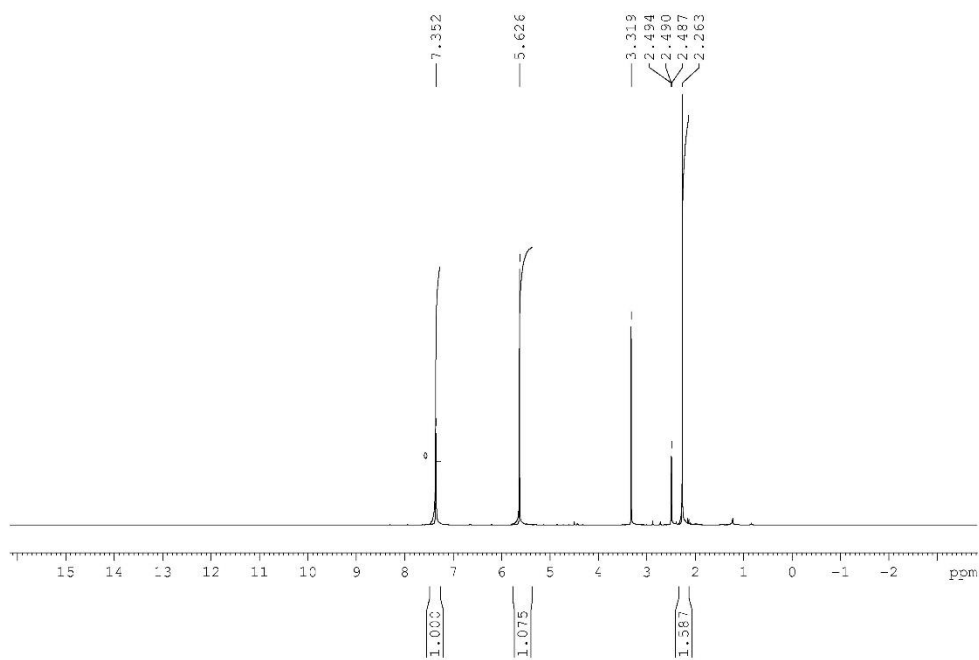

Figure S3. <sup>1</sup>H NMR spectrum of compound 4.

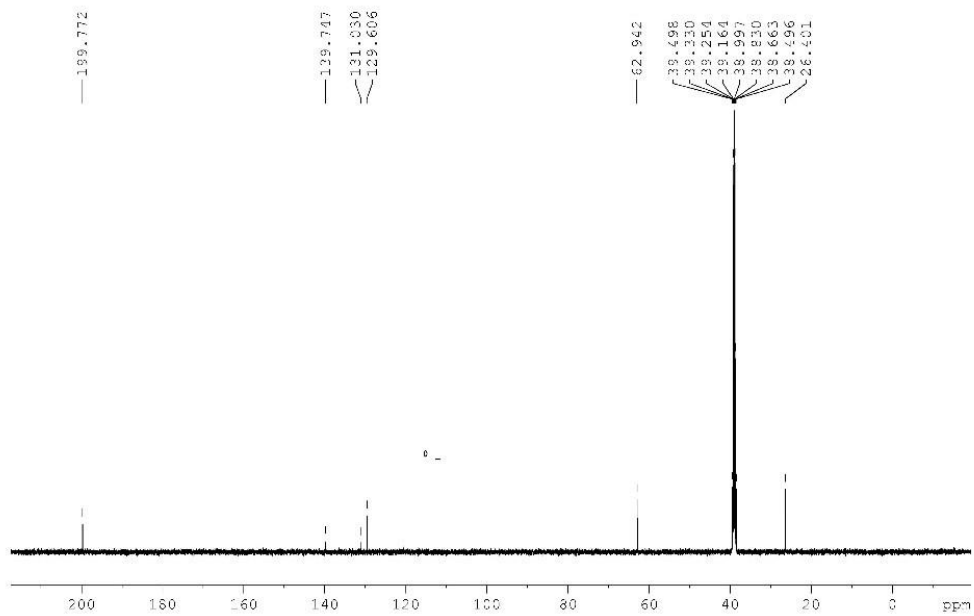

Figure S4. <sup>13</sup>C NMR spectrum of compound 4.

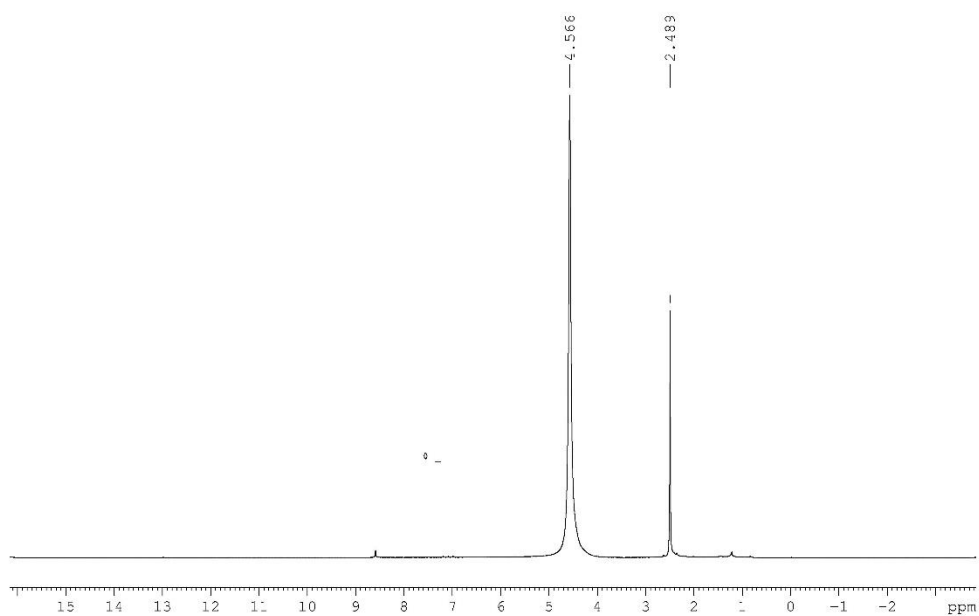

**Figure S5.** <sup>1</sup>H NMR spectrum of compound 5.

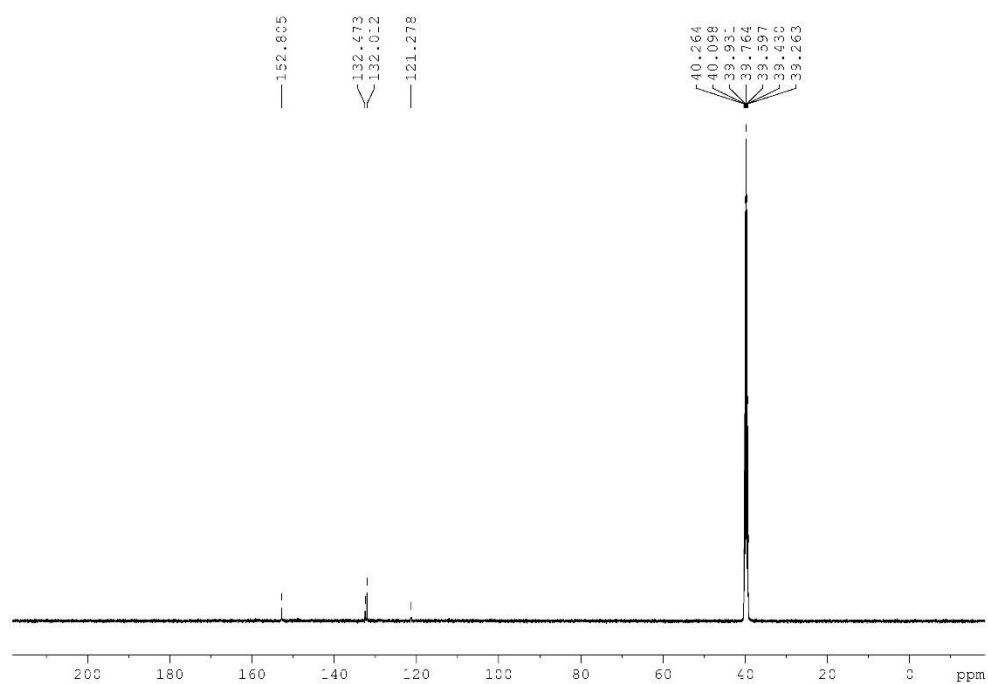

**Figure S6.** <sup>13</sup>C NMR spectrum of compound 5.

新建文件夹.111.fid  
2021-05-16 13C-1 DMSO LXY-111(K red)

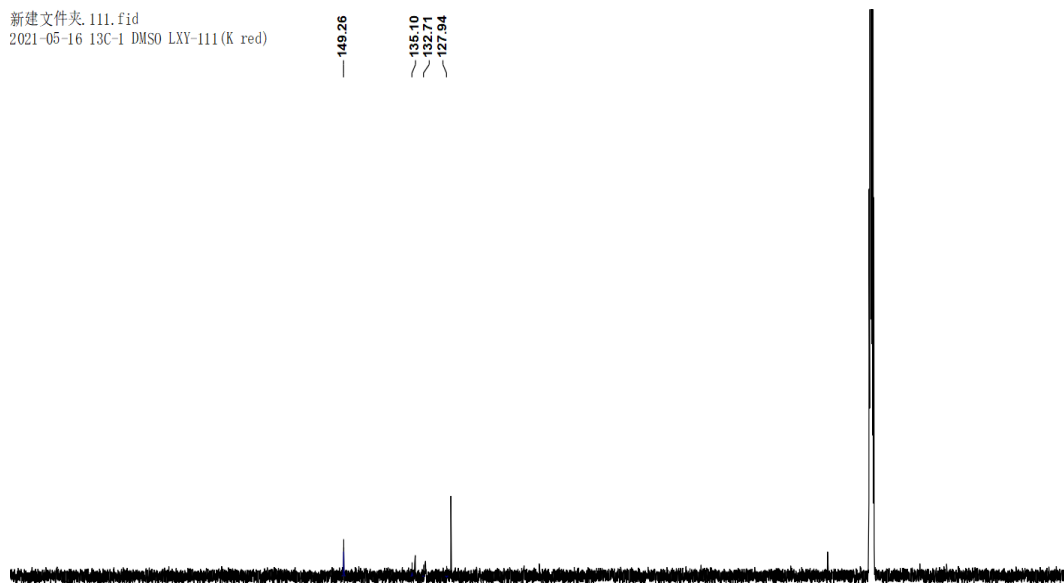

**Figure S7.**  $^{13}\text{C}$  NMR spectrum of compound **6**.

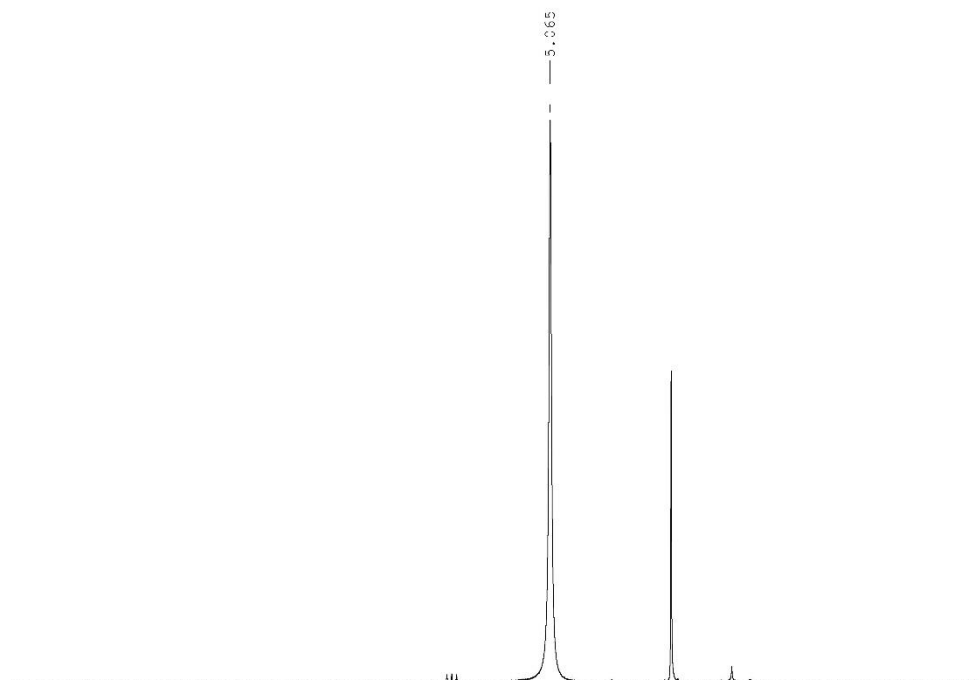

**Figure S8.**  $^1\text{H}$  NMR spectrum of compound **8**· $2\text{H}_2\text{O}$ .

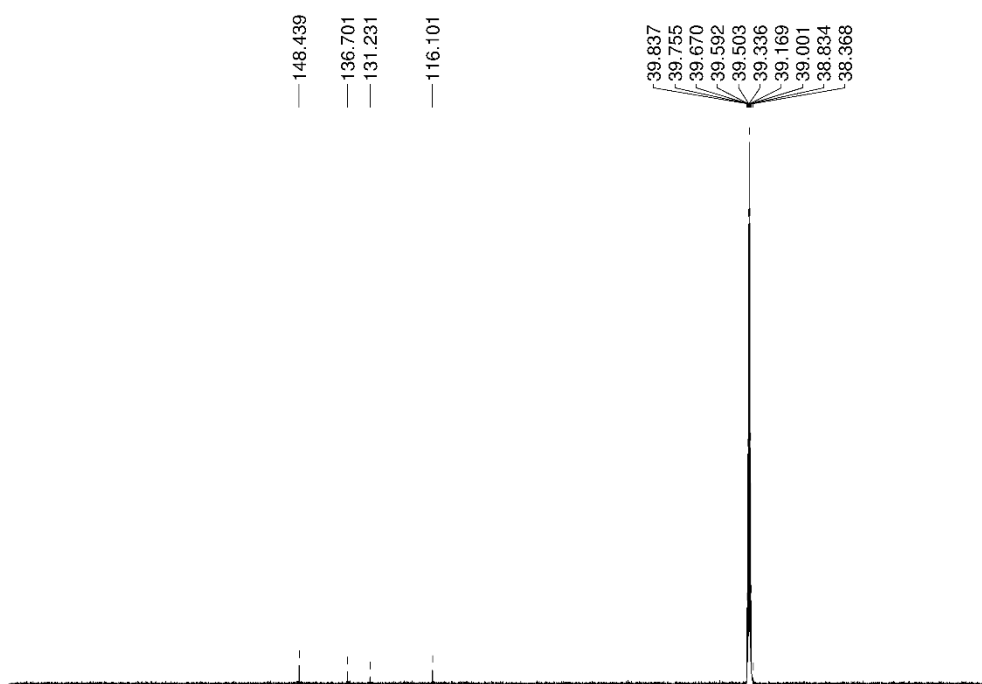

**Figure S9.**  $^{13}\text{C}$  NMR spectrum of compound  $8 \cdot 2\text{H}_2\text{O}$ .

### 5. Mass spectrometry of compound 5 and $8 \cdot 2\text{H}_2\text{O}$ .

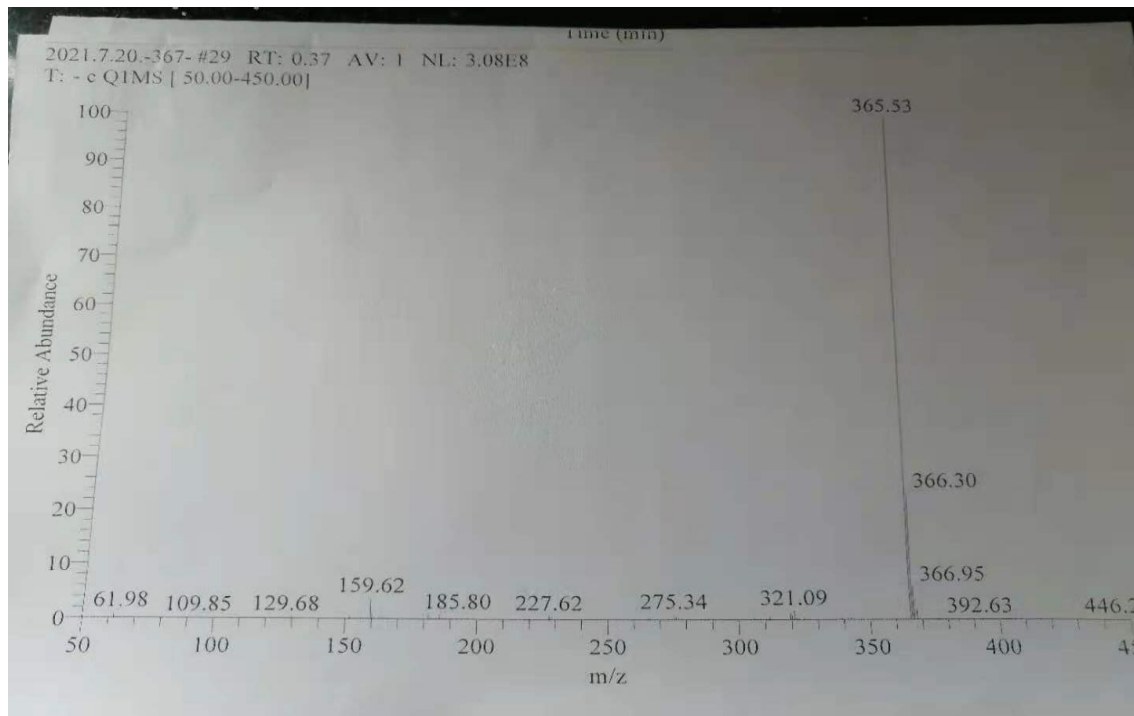

**Figure S10.** The mass spectrum of compound **5**.

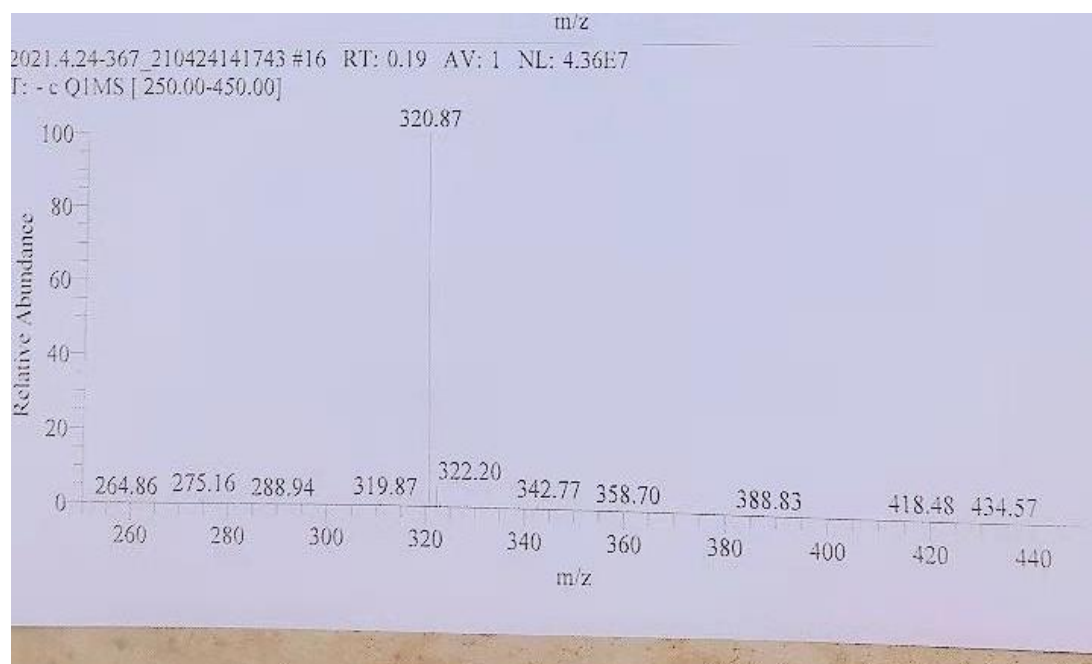

**Figure S11.** The mass spectrum of compound **8·2H<sub>2</sub>O**.

## 6. DSC curves of compounds **6** and **8·2H<sub>2</sub>O**.

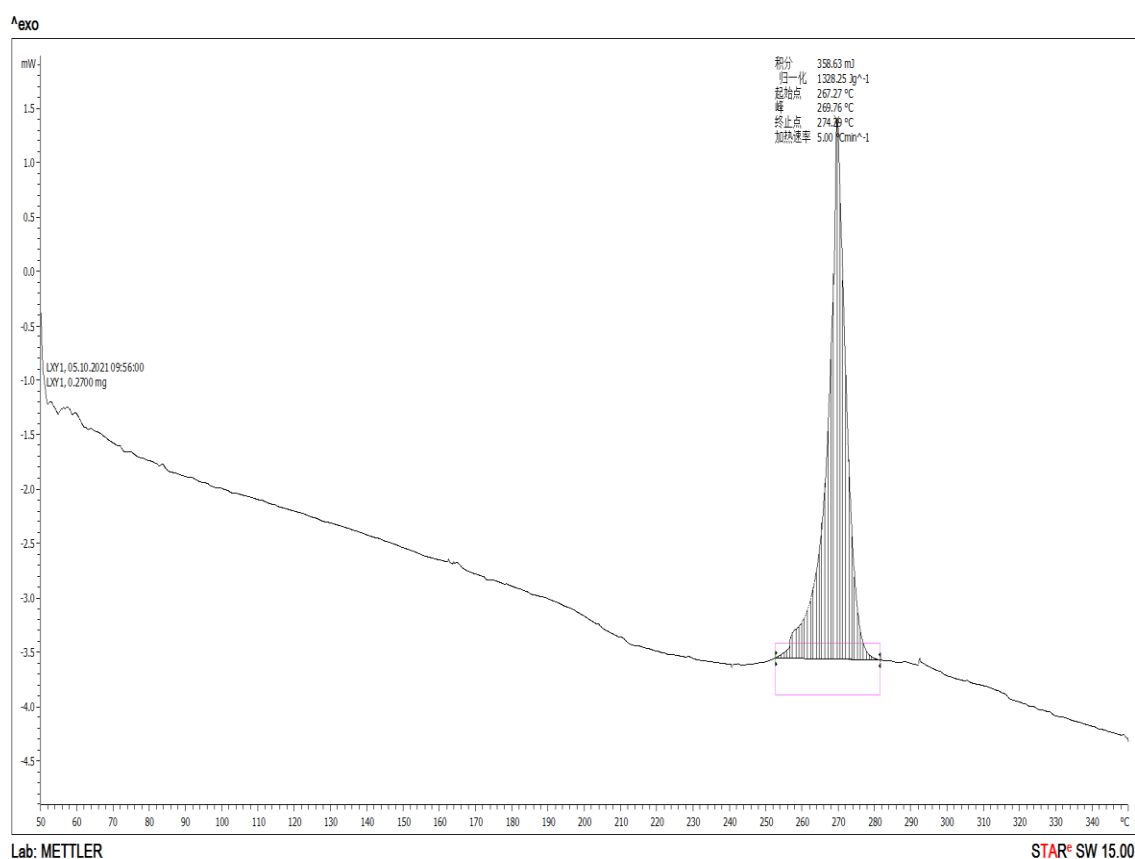

**Figure S12.** The DSC curves of compound **6**.



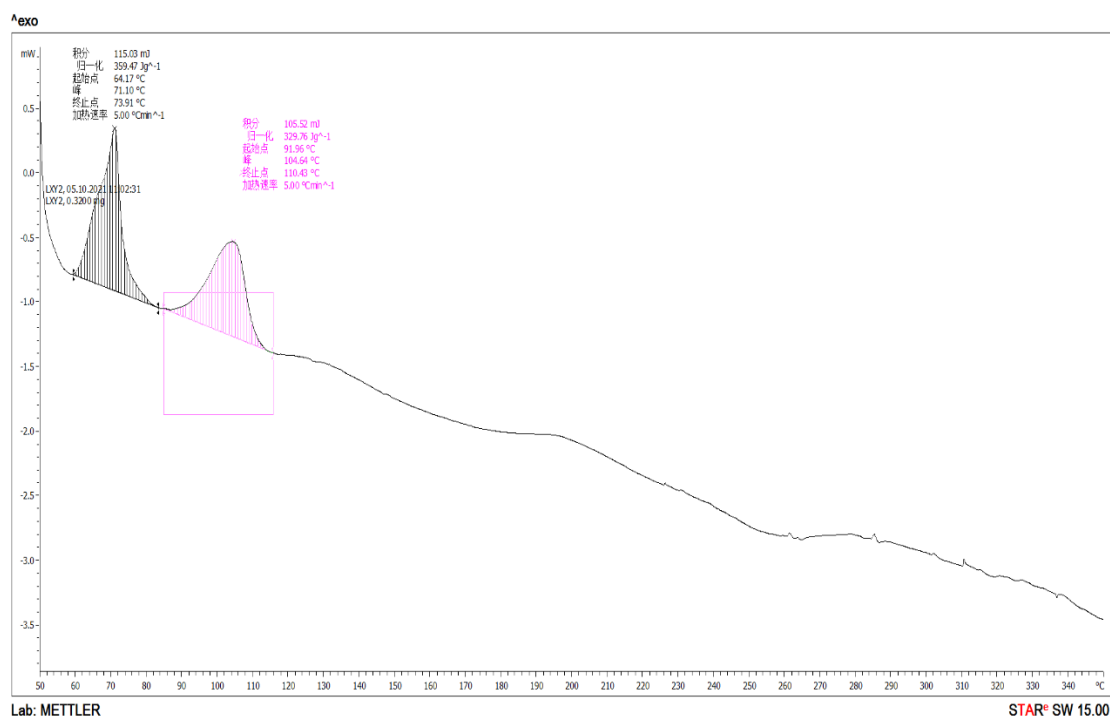

**Figure S13.** The DSC curves of compound **8·2H<sub>2</sub>O**.

- 
- [1] G. M. Sheldrick, SADABS: Area Detector Absorption Correction; University of Göttingen:Göttingen, Germany, 2001.
- [2] Sheldrick, G. M. *SHELXT*–Integrated space-group and crystal structure Determination. *Acta Cryst.* **2015**, *A71*, 3-8.
- [3] H. Gao, C. Ye, C. M. Piekarski, J. M. Shreeve, *J. Phys. Chem. C* **2007**, *111*, 10718–10731.
- [4] Revision A.01, Gaussian, Inc. Wallingford CT, **2009**.
- [5] H. D. B. Jenkins. *Inorg.Chem.* **2002**, *41*, 2364–2367
- [6] (a) M. J. Kamlet, S. J. Jacobs. *J. Chem. Phys.* **1968**, *48*, 23-35; (b) M. J. Kamlet, J. E. Ablard. *J. Chem. Phys.* **1968**, *48*, 36-42; (c) M. J. Kamlet, C. Dicknison. *J. Chem. Phys.* **1968**, *48*, 43-49. (d) H. Gao, C. Ye, C. Piekarski, J. M. Shreeve. *J. Phys. Chem. C.* **2007**, *111*, 10718-10731.
